# Supplementary material for: An eHealth Application in Head and Neck Cancer Survivorship Care: Health Care Professionals' Perspectives
Source: PubMed Central journal article supplement (PMC4642398; doi:10.2196/jmir.4870), 2015-10-21
Supplement: jmir_v17i10e235_app1.pdf [file jmir_v17i10e235_app1.pdf]

System, content, and service quality OncoKompas (strengths and weaknesses).

|                                                                                                                                                                                                                                                                                                                                                                                                                                                                                                                                          | <b>Strengths</b> | <b>Weaknesses</b>                                                                                                                                                                                                                                                                                                                                                                                                                                                                                                                                                                                                                                                                                                                         |
|------------------------------------------------------------------------------------------------------------------------------------------------------------------------------------------------------------------------------------------------------------------------------------------------------------------------------------------------------------------------------------------------------------------------------------------------------------------------------------------------------------------------------------------|------------------|-------------------------------------------------------------------------------------------------------------------------------------------------------------------------------------------------------------------------------------------------------------------------------------------------------------------------------------------------------------------------------------------------------------------------------------------------------------------------------------------------------------------------------------------------------------------------------------------------------------------------------------------------------------------------------------------------------------------------------------------|
| <b>System quality</b>                                                                                                                                                                                                                                                                                                                                                                                                                                                                                                                    |                  |                                                                                                                                                                                                                                                                                                                                                                                                                                                                                                                                                                                                                                                                                                                                           |
| <p><b>Ease of access</b></p> <ul style="list-style-type: none"> <li>• Suitable for survivors: (1) that already take good care of themselves, (2) are well-educated, (3) younger people, (4) have a next of kin who can help</li> <li>• Suitable for HNC population: (1) are retired, (2) are able to book vacations online, (3) new population: HPV virus, (4) eHealth may limit the impairments HNC survivors may face</li> <li>• Available in between HCP consults</li> <li>• 24 hours availability from the home situation</li> </ul> |                  | <p><b>Ease of access</b></p> <ul style="list-style-type: none"> <li>• Not suitable for survivors that: (1) do not speak Dutch or are illiterate, (2) are cognitive or visually impaired, (3) are elderly, (4) have no Internet access or a lack of eHealth literacy skills, (5) are not motivated, (6) do not take care of their well-being, (7) have few symptoms</li> <li>• Not suitable for HNC population: (1) don't like to read, (2) low educational level</li> <li>• The application is built in Flash and therefore not suitable for use on tablets</li> </ul>                                                                                                                                                                    |
| <p><b>Ease of use</b></p> <ul style="list-style-type: none"> <li>• Clear navigation structure: simple lay-out, clear main menu</li> </ul>                                                                                                                                                                                                                                                                                                                                                                                                |                  | <p><b>Ease of use</b></p> <ul style="list-style-type: none"> <li>• Unclear navigation structure: interface too busy, too much scrolling required</li> </ul>                                                                                                                                                                                                                                                                                                                                                                                                                                                                                                                                                                               |
| <p><b>Tailoring / customization</b></p> <ul style="list-style-type: none"> <li>• Possibility to skip the sexuality topic is positive</li> <li>• Survivors can choose between supportive care options which is of added value</li> </ul>                                                                                                                                                                                                                                                                                                  |                  | <p><b>Tailoring / customization</b></p> <ul style="list-style-type: none"> <li>• Survivor should decide which symptoms to monitor</li> <li>• Information, advices provided is / are too general</li> <li>• Unclear that advice is tailored to the specific survivor</li> </ul>                                                                                                                                                                                                                                                                                                                                                                                                                                                            |
| <p><b>Conditioning</b></p> <ul style="list-style-type: none"> <li>• Option to print the results to share these with the HCP</li> <li>• Patients receive concrete, interesting and tailored advice: asset to surfing</li> </ul>                                                                                                                                                                                                                                                                                                           |                  | <p><b>Conditioning</b></p> <ul style="list-style-type: none"> <li>• Lack of a trigger to return to the application</li> <li>• Lack of a 'check' if the survivor has taken action</li> <li>• System should provide reminders to take action</li> </ul>                                                                                                                                                                                                                                                                                                                                                                                                                                                                                     |
| <b>Content Quality</b>                                                                                                                                                                                                                                                                                                                                                                                                                                                                                                                   |                  |                                                                                                                                                                                                                                                                                                                                                                                                                                                                                                                                                                                                                                                                                                                                           |
| <p><b>Evidence-based</b></p> <ul style="list-style-type: none"> <li>• Use of validated PROs: reliable</li> <li>• Evidence-based content, advices and supportive care options provided in line with HCPs' expectations</li> </ul>                                                                                                                                                                                                                                                                                                         |                  | <p><b>Evidence-based</b></p> <ul style="list-style-type: none"> <li>• Tension between goal <i>OncoKompas</i> and usage of validated PROs</li> </ul>                                                                                                                                                                                                                                                                                                                                                                                                                                                                                                                                                                                       |
| <p><b>Comprehensibility</b></p> <ul style="list-style-type: none"> <li>• Clear questioning: comprehensible questions</li> <li>• Information and supportive care options offered at different levels of understanding</li> <li>• Advice easy to follow; when complicated accurate referral to HCP</li> </ul>                                                                                                                                                                                                                              |                  | <p><b>Comprehensibility</b></p> <ul style="list-style-type: none"> <li>• Complicated questioning: multi-interprettable, similar, difficult, inappropriate intonation and formulation</li> <li>• Complicated answering categories</li> <li>• Difficult and abstract terminology</li> <li>• Difference unclear between advised and alternative supportive care options</li> </ul>                                                                                                                                                                                                                                                                                                                                                           |
| <p><b>Complete</b></p> <ul style="list-style-type: none"> <li>• Complete picture: all QOL aspects included</li> <li>• In-depth questioning</li> <li>• Visibility of interdependence of QOL domains</li> <li>• Complete overview supportive care options</li> <li>• Survivors can choose between different supportive care options</li> </ul>                                                                                                                                                                                             |                  | <p><b>Incomplete</b></p> <ul style="list-style-type: none"> <li>• Clear introduction to PROs is missing</li> <li>• Too little focus on interdependence between domains</li> <li>• No perspective offered about the "normal" population</li> <li>• Missing (information on) supportive care options: eg regional options, whether you need a referral, costs, inclusion in a quality register, option to get in contact</li> </ul> <p><b>Over complete</b></p> <ul style="list-style-type: none"> <li>• Too much text to read when you are ill/recovering</li> <li>• Information is provided twofold</li> <li>• Including flyers: more information leads to more questions</li> <li>• Too many supportive care options provided</li> </ul> |

| <b>Service Quality</b>                                                                                                                                                                                                                                                                                                                                 |                                                                                                                                                                                                                                                                                                                                                                                            |
|--------------------------------------------------------------------------------------------------------------------------------------------------------------------------------------------------------------------------------------------------------------------------------------------------------------------------------------------------------|--------------------------------------------------------------------------------------------------------------------------------------------------------------------------------------------------------------------------------------------------------------------------------------------------------------------------------------------------------------------------------------------|
| <p><b>Perceived usefulness “identification of symptoms”</b></p> <ul style="list-style-type: none"> <li>• Symptoms may become more clear by means of PROs</li> <li>• Leads to clarification of request for help</li> </ul>                                                                                                                              | <p><b>Perceived lack of usefulness “identification of symptoms”</b></p> <ul style="list-style-type: none"> <li>• Lack of nuance in identifying symptoms</li> <li>• Impossible to tailor system as much as a consultation</li> </ul>                                                                                                                                                        |
| <p><b>Perceived usefulness “informing participants”</b></p> <ul style="list-style-type: none"> <li>• Generates new insights and knowledge for survivors</li> <li>• <i>Recognition</i>: validation of survivors feelings</li> <li>• Approachable for mild symptoms and delicate topics, survivors do not want to burden their physician with</li> </ul> | <p><b>Perceived lack of usefulness “informing participants”</b></p> <ul style="list-style-type: none"> <li>• Easier for survivors to contact outpatient clinic</li> <li>• Possibly wrong information gathering by wrong clicks</li> <li>• Difficult for already tired participants to act upon personalized advice</li> </ul>                                                              |
| <p><b>Perceived usefulness “referring participants”</b></p> <ul style="list-style-type: none"> <li>• More specific, earlier, easier referral to supportive care</li> <li>• Survivor can take initiative in asking for a referral</li> <li>• Referral to own physician supports survivors to discuss symptoms with their physician</li> </ul>           | <p><b>Perceived lack of usefulness “referring participants”</b></p> <ul style="list-style-type: none"> <li>• Leads to confusion when many advices are prompted</li> <li>• During consultation problems are easier to prioritize</li> <li>• Not clear for survivors what to do after finishing <i>OncoKompas</i></li> <li>• Success depends on the assertiveness of the survivor</li> </ul> |
| <p><b>Perceived usefulness “overall service”</b></p> <ul style="list-style-type: none"> <li>• Support in post-treatment period</li> <li>• Increased patient empowerment</li> <li>• Increased attention for QOL of survivors</li> <li>• Improved preparation for consultation with physician</li> </ul>                                                 | <p><b>Perceived lack of usefulness “overall service”</b></p> <ul style="list-style-type: none"> <li>• Increased workload HCPs</li> <li>• Increased worries about symptoms that survivors were not aware of and an increased focus on cancer</li> <li>• Symptoms discussed in <i>OncoKompas</i> not mentioned to HCPs</li> </ul>                                                            |
