# Supplementary material for: An eHealth Application in Head and Neck Cancer Survivorship Care: Health Care Professionals' Perspectives
Source: PubMed Central journal article supplement (PMC4642398; doi:10.2196/jmir.4870), 2015-10-21
Supplement: jmir_v17i10e235_app2.pdf [file jmir_v17i10e235_app2.pdf]

Implementation of OncoKompas.

| <b>Procedure introducing OK to patient</b>                                                                                                                                                                                                                                                                                                                                                                             |                                                                                                                                                                                                                                                                                                                                                                                                                                                                                                                         |
|------------------------------------------------------------------------------------------------------------------------------------------------------------------------------------------------------------------------------------------------------------------------------------------------------------------------------------------------------------------------------------------------------------------------|-------------------------------------------------------------------------------------------------------------------------------------------------------------------------------------------------------------------------------------------------------------------------------------------------------------------------------------------------------------------------------------------------------------------------------------------------------------------------------------------------------------------------|
| <p><i>Accurate introduction of OncoKompas</i></p> <ul style="list-style-type: none"> <li>• According to a routine, to prevent that survivors that may benefit from <i>OncoKompas</i> are not referred</li> </ul>                                                                                                                                                                                                       | <ul style="list-style-type: none"> <li>• Through (1) a flyer, (2) a website, (3) posters in waiting area, (4) a demo of <i>OncoKompas</i></li> <li>• Included in a care pathway (eg after dismissal)</li> <li>• At set times/moments (eg after dismissal)</li> <li>• Responsibility introduction with one person</li> <li>• Availability of a trigger for introduction for HCPs so it cannot be forgotten</li> </ul>                                                                                                    |
| <b>Implementation as self-management application</b>                                                                                                                                                                                                                                                                                                                                                                   | <b>Implementation as supported self-management application</b>                                                                                                                                                                                                                                                                                                                                                                                                                                                          |
| <p><i>Stimulates survivor empowerment</i></p> <ul style="list-style-type: none"> <li>• Survivors have to take action themselves</li> <li>• Enables survivors to indicate priorities during consultation</li> <li>• Survivor determines how to handle symptoms and not the physician</li> <li>• Survivor needs to be motivated to address his complaints, otherwise stimulation by HCP will not be effective</li> </ul> | <p><i>Responsibility well-being patients with HCP</i></p> <ul style="list-style-type: none"> <li>• Self-management not fully accepted in health care</li> <li>• Responsibility well-being always (partially) with HCP</li> <li>• HCP responsible when survivor receives suboptimal care</li> <li>• QOL difficult to act upon by HCPs if they don't have insight into results</li> <li>• Important that symptoms unrelated to a specific specialty (eg anxiety, fatigue) receive attention and are noticeable</li> </ul> |
| <p><i>Survivor is responsible for own well-being</i></p> <ul style="list-style-type: none"> <li>• Responsibility lies with survivor to take action upon symptoms</li> <li>• Referral by <i>OncoKompas</i> in case of suboptimal QOL relieves HCPs' responsibility</li> <li>• Survivor can bring printed results to consultation</li> </ul>                                                                             | <p><i>Feedback through access OncoKompas or system alert</i></p> <ul style="list-style-type: none"> <li>• HCPs are interested in <i>OncoKompas</i> results of survivors</li> <li>• Feedback creates opportunity to discuss results during consultation</li> <li>• HCPs want an alert when survivor has a suboptimal QOL and does not take action</li> <li>• Survivor without printer cannot take results to HCP</li> </ul>                                                                                              |
| <p><i>Privacy of survivor is protected</i></p> <ul style="list-style-type: none"> <li>• Survivor is able to choose what to share with the HCP</li> <li>• No social desirability because HCP cannot view results</li> <li>• HCPs doubt whether survivors would like their results known by HCPs</li> </ul>                                                                                                              | <p><i>Problems surrounding privacy survivors</i></p> <ul style="list-style-type: none"> <li>• Survivors need to be well informed about who has access to their information and give consent</li> <li>• Some aspects of <i>OncoKompas</i> are of no importance to HCPs (such as financial issues)</li> <li>• IT issues (accessibility) in how <i>OncoKompas</i> would be safe to use for HCPs</li> </ul>                                                                                                                 |
| <p><i>Difficult to discuss results during regular consultation</i></p> <ul style="list-style-type: none"> <li>• Time pressure</li> <li>• Other priorities during consultation (cancer recurrence)</li> <li>• Problems in prioritizing during consultation</li> </ul>                                                                                                                                                   | <p><i>Requires action from HCP</i></p> <ul style="list-style-type: none"> <li>• Survivors expect HCP to be aware of their results</li> <li>• Lack of HCPs' action may lead to disappointment and have a negative impact on doctor-patient relation</li> <li>• Dependence of survivor in doctor-patient relationship requires action from HCPs</li> </ul>                                                                                                                                                                |
